# Supplementary material for: Emissive lanthanide dicyanoaurate coordination polymers with 2,2′-bipyridine dioxide antenna groups and their hydration states
Source: Royal Society of Chemistry journal article supplement (doi:10.1039/d3ce00583f), 2023-01-01
Supplement: d3ce00583f1.pdf [file d3ce00583f1.pdf]

# Emissive Lanthanide Dicyanoaurate Coordination Polymers with 2,2'-Bipyridine Dioxide Antenna Groups and their Hydration States

Matthew L. Brown, Thomas E. Karpiuk, Daniel B. Leznoff\*

Department of Chemistry, Simon Fraser University, 8888 University Drive,  
Burnaby, British Columbia, V5A 1S6, Canada. Email: dleznoff@sfu.ca

## Supporting Information

**Table S1** Ligand angles in the **1Ln** structures

| Lanthanide | O-Ln-O<br>(°) | Angle between<br>aromatic rings<br>(°) |
|------------|---------------|----------------------------------------|
| Ce         | 69.56(7)      | 59.28                                  |
| Nd         | 70.24(11)     | 58.30                                  |
| Sm         | 70.61(5)      | 57.86                                  |
| Eu         | 71.08(8)      | 58.23                                  |
| Tb         | 71.4(2)       | 58.24                                  |
| Dy         | 71.59(11)     | 57.61                                  |
| Yb         | 72.34(6)      | 56.57                                  |

**Table S2** Au···Au distances in the **1Ln** structures

| Lanthanide | Au···Au Distance<br>(Å) |
|------------|-------------------------|
| Ce         | 3.2994(5)               |
| Nd         | 3.3813(3)               |
| Sm         | 3.3457(2)               |
| Eu         | 3.29740(17)             |
| Tb         | 3.3042(5)               |
| Dy         | 3.2993(2)               |
| Yb         | 3.30638(18)             |

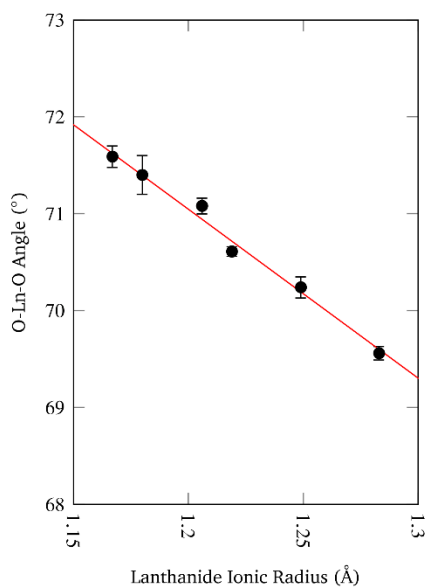

**Fig. S1** The O-Ln-O bite angles in the **1Ln** structures plotted against the crystal radius (effective ionic radius + 0.14 Å) of the lanthanide ion with coordination number eight.<sup>1</sup> This data has been given an unweighted linear fit to  $y = -17.44x + 91.975$  which gives an  $R^2 = 0.9931$ , indicating a strong linear correlation between lanthanide crystal radius and the O-Ln-O bond angle.

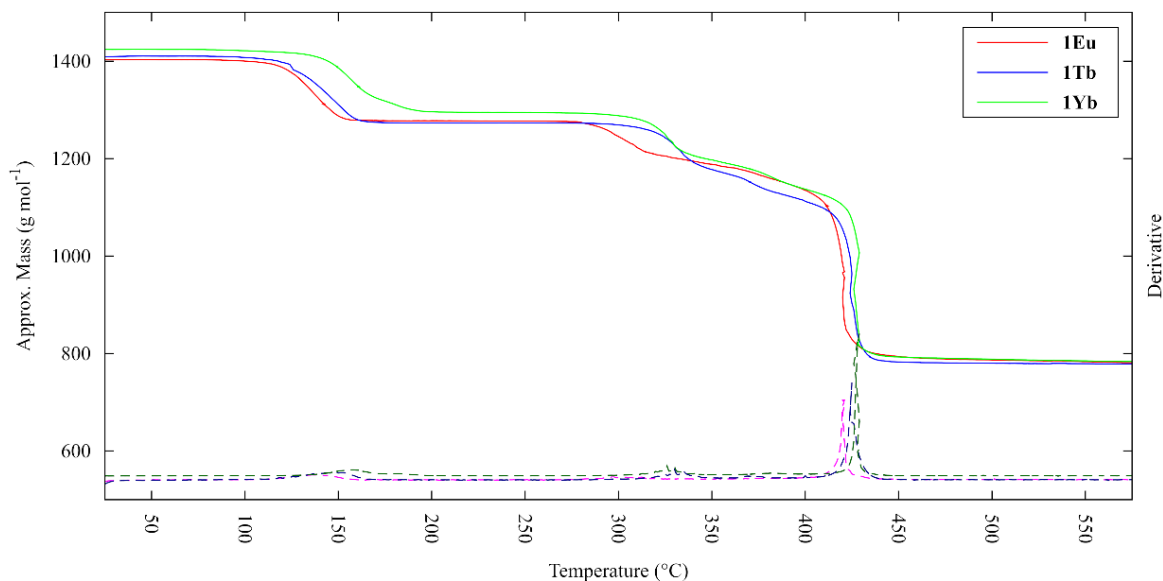

**Fig. S2** Thermogravimetric analysis data samples of **1Ln**. Mass (solid lines) and the first derivative (dashed lines) plotted on separate axes.

**Table S3** Yields of **1Ln**

| Lanthanide | Reaction Scale<br>(mmol) | Yield<br>(mg) | Yield<br>(%) | Evaporation Time<br>(days) |
|------------|--------------------------|---------------|--------------|----------------------------|
| La         | 0.40                     | 16            | 23           | 54                         |
| Ce         | 0.05                     | 27            | 27           | 64                         |
| Nd         | 0.05                     | 33            | 47           | 16                         |
| Sm         | 0.05                     | 32            | 46           | 17                         |
| Eu         | 0.05                     | 23            | 33           | 31                         |
| Gd         | 0.05                     | 49            | 70           | 16                         |
| Tb         | 0.05                     | 51            | 72           | 16                         |
| Dy         | 0.05                     | 44            | 62           | 31                         |
| Tm         | 0.05                     | 49            | 69           | 16                         |
| Yb         | 0.05                     | 48            | 67           | 61                         |
| Lu         | 0.05                     | 48            | 67           | 17                         |

**Table S4** Elemental analysis results for **1Ln**

| Ln         |       | C     | H    | N     |
|------------|-------|-------|------|-------|
|            |       | (%)   | (%)  | (%)   |
| Ce         | Calc. | 25.89 | 2.32 | 10.06 |
|            | Exp.  | 25.92 | 2.36 | 10.16 |
| Nd         | Calc. | 25.81 | 2.31 | 10.04 |
|            | Exp.  | 25.97 | 2.69 | 10.20 |
| Sm         | Calc. | 25.70 | 2.30 | 9.99  |
|            | Exp.  | 26.00 | 2.74 | 10.22 |
| Eu         | Calc. | 25.67 | 2.30 | 9.98  |
|            | Exp.  | 25.76 | 2.32 | 10.05 |
| Eu Desolv. | Calc. | 24.49 | 1.26 | 10.98 |
|            | Exp.  | 24.38 | 1.55 | 10.93 |
| Tb         | Calc. | 25.55 | 2.29 | 9.93  |
|            | Exp.  | 25.44 | 2.47 | 9.88  |
| Dy         | Calc. | 25.48 | 2.28 | 9.91  |
|            | Exp.  | 25.57 | 2.51 | 10.05 |
| Tm         | Calc. | 25.37 | 2.27 | 9.86  |
|            | Exp.  | 25.30 | 2.50 | 9.84  |
| Yb         | Calc. | 25.29 | 2.26 | 9.83  |
|            | Exp.  | 25.30 | 2.62 | 9.80  |

**Table S5** IR peaks for **1Ln**

| Ln         | Frequency (cm <sup>-1</sup> )                                                                                                                                                      |
|------------|------------------------------------------------------------------------------------------------------------------------------------------------------------------------------------|
| Ce         | 3729, 3417, 3091, 3190, 3125, 3106, 2972, 2888, 2180, 2164, 2145, 1477, 1475, 1445, 1257, 1243, 1445, 1426, 1236, 1229, 1217, 1044, 1034, 850, 838, 776, 732, 718                  |
| Nd         | 3737, 3409, 3192, 3123, 3107, 3093, 2973, 2891, 2181, 2165, 2147, 1477, 1475, 1446, 1426, 1423, 1258, 1244, 1237, 1230, 1217, 1045, 1033, 851, 838, 776, 733, 718                  |
| Eu         | 3416, 3199, 3126, 3110, 3093, 2974, 2888, 2182, 2165, 2147, 1477, 1475, 1428, 1258, 1239, 1239, 1230, 1218, 1045, 851, 839, 776, 732, 719                                          |
| Gd         | 3733, 3411, 3215, 3132, 3107, 3092, 2973, 2888, 2182, 2166, 2146, 1477, 1475, 1427, 1257, 1245, 1239, 1231, 1219, 1045, 1033, 853, 839, 777, 733, 718                              |
| Tb         | 3735, 3414, 3206, 3125, 3108, 3093, 2973, 2886, 2443, 2355, 2183, 2166, 2146, 1477, 1475, 1427, 1422, 1257, 1246, 1240, 1231, 1219, 1045, 1034, 856, 851, 840, 777, 733, 718       |
| Dy         | 3735, 3410, 3215, 3121, 3109, 3093, 2974, 2889, 2183, 2166, 2147, 1477, 1475, 1427, 1257, 1241, 1232, 1219, 1046, 851, 840, 777, 732, 718                                          |
| Tm         | 3730, 3412, 3221, 3127, 3109, 3094, 2974, 2934, 2887, 2184, 2166, 2147, 1477, 1457, 1449, 1446, 1427, 1422, 1258, 1248, 1242, 1232, 1221, 1046, 1034, 857, 852, 841, 776, 733, 718 |
| Yb         | 3410, 3214, 3128, 3109, 3095, 2974, 2891, 2185, 2166, 2147, 1477, 1475, 1426, 1259, 1242, 1233, 1221, 1046, 841, 776, 718                                                          |
| 25:75 SmTb | 3737, 3412, 3205, 3127, 3109, 3093, 2973, 2886, 2182, 2166, 2147, 1477, 1475, 1427, 1257, 1246, 1239, 1231, 1219, 1045, 850, 839, 777, 732, 718                                    |
| 75:25 SmTb | 3664, 3412, 3205, 3127, 3109, 3093, 2973, 2892, 2182, 2166, 2147, 1477, 1475, 1427, 1257, 1246, 1239, 1231, 1219, 1045, 850, 839, 777, 732, 718                                    |
| 50:50 CeSm | 3409, 3207, 3111, 3094, 2973, 2889, 2181, 2165, 2155, 2146, 1477, 1475, 1446, 1426, 1423, 1257, 1245, 1237, 1230, 1218, 1045, 1032, 850, 838, 775, 732, 718                        |

$\nu$ CN peaks are *marked*.

**Table S6** Raman peaks for **1Ln**

| Ln | Laser<br>(nm) | Frequency (cm <sup>-1</sup> )                                                                                                                                                                                                                                                                                                  |
|----|---------------|--------------------------------------------------------------------------------------------------------------------------------------------------------------------------------------------------------------------------------------------------------------------------------------------------------------------------------|
| Ce | 514           | 3091, 3078, <i>2180</i> , <i>2162</i> , 1619, 1608, 1569, 1507, 1423, 1313, 1256, 1244, 1218, 1162, 1122, 1105, 1074, 1053, 1001, 960, 885, 856, 787, 748, 734, 639, 589, <i>557</i> , <i>537</i> , 484, 410, 351, 307, 287, 279, 174, 130                                                                                     |
| Eu | 785           | 3080, 3030, 2921, <i>2182</i> , <i>2161</i> , 1619, 1605, 1571, 1315, 1258, 1246, 1220, 1156, 1123, 1054, 1034, 885, 856, 839, 748, 735, 715, 713, 639, 587, 558, 526, 486, 472, 303, 291, 289, 181, 151, 149, 141                                                                                                             |
| Tb | 785           | 3079, 3033, 2922, <i>2183</i> , <i>2167</i> , <i>2161</i> , 1620, 1606, 1574, 1509, 1315, 1257, 1248, 1221, 1157, 1124, 1053, 1034, 885, 856, 840, 749, 735, 639, 584, 558, 527, 488, 447, 320, 305, 290, 283, 189, 150, 143, 118                                                                                              |
| Dy | 785           | 3080, 3031, 2919, 2886, <i>2183</i> , <i>2161</i> , 1619, 1606, 1573, 1508, 1444, 1424, 1315, 1258, 1248, 1221, 1156, 1123, 1051, 1034, 886, 857, 840, 749, 735, 713, 639, 588, <i>557</i> , <i>527</i> , 517, 488, 448, 360, 307, 290, 283, 186, 152, 143, 114                                                                |
| Yb | 785           | 3080, 3030, 2920, 2874, 2871, 2777, 2631, 2492, 2338, 2249, <i>2185</i> , <i>2162</i> , 1619, 1606, 1574, 1509, 1477, 1444, 1315, 1272, 1259, 1250, 1220, 1158, 1123, 1059, 1051, 1036, 1001, 956, 886, 876, 858, 843, 786, 750, 736, 640, 587, 558, 530, 519, 490, 448, 419, 364, 322, 311, 291, 286, 198, 178, 154, 145, 121 |

*ν*CN peaks are *marked*.

**Table S7** Yields of **2Ln**

| Lanthanide | Reaction Scale | Yield | Yield | Evaporation Time |
|------------|----------------|-------|-------|------------------|
|            | (mmol)         | (mg)  | (%)   | (days)           |
| La         | 0.05           | 43    | 62    | 3                |
| Ce         | 0.05           | 1     | 13    | 48               |
| Nd         | 0.05           | 19    | 27    | 48               |
| Sm         | 0.05           | 23    | 33    | 17               |
| Eu         | 0.05           | 45    | 64    | 17               |
| Tb         | 0.05           | 25    | 35    | 17               |
| Tm         | 0.05           | 24    | 34    | 48               |
| Yb         | 0.05           | 55    | 77    | 17               |

**Table S8** Elemental analysis results for **2Ln** · 5 H<sub>2</sub>O

| Ln |        | C     | H    | N     |
|----|--------|-------|------|-------|
|    |        | (%)   | (%)  | (%)   |
| Ce | Calc.* | 22.47 | 2.18 | 10.08 |
|    | Exp.   | 22.25 | 2.34 | 9.84  |
| Eu | Calc.  | 22.87 | 1.92 | 10.26 |
|    | Exp.   | 23.28 | 1.73 | 10.69 |
| Gd | Calc.  | 22.78 | 1.91 | 10.22 |
|    | Exp.   | 22.47 | 2.23 | 10.20 |
| Tb | Calc.  | 22.75 | 1.91 | 10.21 |
|    | Exp.   | 22.87 | 2.16 | 10.20 |
| Dy | Calc.  | 22.70 | 1.90 | 10.18 |
|    | Exp.   | 23.17 | 2.18 | 10.42 |
| Tm | Calc.  | 22.59 | 1.90 | 10.13 |
|    | Exp.   | 22.99 | 2.01 | 10.23 |
| Yb | Calc.  | 22.52 | 1.89 | 10.10 |
|    | Exp.   | 22.60 | 2.29 | 10.22 |

\*Calc. amounts based on **2Ce** · 6 H<sub>2</sub>O due to better match; sample may not have fully transformed to **2Ce** · 5 H<sub>2</sub>O before being analyzed.

**Table S9** IR peaks of **2Ln** · 6 H<sub>2</sub>O

| Ln | Frequency (cm <sup>-1</sup> )                                                                                 |
|----|---------------------------------------------------------------------------------------------------------------|
| Eu | 3635, 3632, 3625, 2177, 2157, 1475, 1425, 1422, 1257, 1248, 1236, 1228, 1216, 848, 837, 777, 775              |
| Tb | 3632, 3308, 3140, 2178, 2172, 2157, 2147, 1477, 1475, 1426, 1423, 1258, 1249, 1236, 1229, 1216, 850, 839, 775 |

$\nu$ CN peaks are *marked*.



**Table S10** IR peaks of **2Ln · 5 H<sub>2</sub>O**

| Ln | Frequency (cm <sup>-1</sup> )                                                                                                                               |
|----|-------------------------------------------------------------------------------------------------------------------------------------------------------------|
| Nd | 3741, 3388, 3131, 3096, 3064, <i>2179</i> , <i>2148</i> , 1642, 1478, 1475, 1425, 1423, 1257, 1232, 1224, 1215, 847, 836, 768                               |
| Sm | 3631, 3303, 3137, 3079, 2175, <i>2171</i> , <i>2155</i> , <i>2141</i> , 1477, 1475, 1426, 1423, 1260, 1249, 1236, 1228, 1216, 851, 837, 780, 774            |
| Eu | 3635, 3632, 3625, 3310, 3217, <i>2175</i> , <i>2171</i> , <i>2155</i> , 1475, 1425, 1422, 1259, 1249, 1236, 1228, 1216, 848, 837, 780, 774                  |
| Gd | 3740, 3631, 3315, 3229, 3143, 3079, <i>2176</i> , <i>2171</i> , <i>2155</i> , 1477, 1475, 1426, 1426, 1260, 1249, 1236, 1228, 1217, 850, 839, 774, 734, 714 |
| Tb | 3636, 3632, 3625, 3310, 3217, <i>2177</i> , <i>2172</i> , <i>2156</i> , 1475, 1425, 1422, 1260, 1249, 1236, 1228, 1216, 849, 838, 774                       |
| Tm | 3636, 3330, 3144, 3094, <i>2180</i> , <i>2176</i> , <i>2157</i> , <i>2146</i> , 1477, 1475, 1426, 1422, 1259, 1249, 1237, 1229, 1217, 850, 840, 776         |
| Yb | 3636, 3330, 3144, 3094, <i>2181</i> , <i>2176</i> , <i>2157</i> , <i>2146</i> , 1477, 1475, 1426, 1422, 1259, 1249, 1237, 1229, 1217, 850, 840, 776         |

*ν*CN peaks are *marked*.

**Table S11** IR peaks of **2Ln · 4 H<sub>2</sub>O**

| Ln | Frequency (cm <sup>-1</sup> )                                                                                                                           |
|----|---------------------------------------------------------------------------------------------------------------------------------------------------------|
| Sm | 3636, 3635, 3624, 3310, 3217, <i>2174</i> , <i>2170</i> , <i>2154</i> , 1475, 1425, 1422, 1259, 1249, 1237, 1228, 1217, 851, 839, 774                   |
| Eu | 3635, 3632, 3625, 3310, 3217, <i>2170</i> , <i>2154</i> , 1475, 1425, 1422, 1259, 1249, 1237, 1228, 1218, 848, 839, 774                                 |
| Tb | 3310, 3217, <i>2171</i> , <i>2154</i> , 1475, 1425, 1422, 1259, 1250, 1237, 1228, 1218, 849, 839, 774                                                   |
| Dy | 3741, 3327, 3229, 3143, 3101, 3088, 3079, <i>2187</i> , <i>2171</i> , <i>2154</i> , 1477, 1475, 1425, 1423, 1260, 1250, 1236, 1228, 1218, 849, 840, 774 |

*ν*CN peaks are *marked*.

**Table S12** IR peaks of **2Ln · 0 H<sub>2</sub>O**

| Ln | Frequency (cm <sup>-1</sup> )                                                                                                             |
|----|-------------------------------------------------------------------------------------------------------------------------------------------|
| Sm | 3338, 3125, 3108, 3085, 3064, <i>2164</i> , <i>2146</i> , <i>2138</i> , 1477, 1475, 1427, 1261, 1247, 1239, 1217, 850, 838, 781, 768, 717 |
| Eu | 3338, 3125, 3108, 3085, 3064, <i>2165</i> , <i>2146</i> , <i>2138</i> , 1477, 1475, 1427, 1261, 1247, 1239, 1218, 850, 838, 781, 768, 717 |
| Dy | 3338, 3125, 3108, 3085, 3064, <i>2167</i> , <i>2146</i> , <i>2138</i> , 1477, 1475, 1427, 1261, 1248, 1240, 1218, 852, 839, 782, 768, 717 |

*ν*CN peaks are *marked*.

**Table S13** Raman peaks of **2Ln · 5 H<sub>2</sub>O**

| Ln | Laser Frequency (cm <sup>-1</sup> )                                                                                                                                                                                                                                     |
|----|-------------------------------------------------------------------------------------------------------------------------------------------------------------------------------------------------------------------------------------------------------------------------|
|    | (nm)                                                                                                                                                                                                                                                                    |
| La | 785 3086, 2169, 1620, 1604, 1572, 1509, 1317, 1256, 1160, 1069, 1035, 877, 858, 733, 639, 586, 556, 534, 481, 300, 290, 182, 143                                                                                                                                        |
| Nd | 514 3096, 3081, 3037, 2197, 2154, 1620, 1605, 1570, 1507, 1317, 1259, 1219, 1155, 1055, 886, 858, 734, 639, 589, 557, 488, 407, 300, 281, 139, 121                                                                                                                      |
| Sm | 514 3197, 3136, 3086, 3081, 3037, 2923, 2783, 2702, 2626, 2460, 2176, 2156, 1621, 1605, 1571, 1508, 1317, 1259, 1250, 1240, 1217, 1155, 1103, 1069, 1055, 1034, 887, 859, 790, 750, 734, 639, 589, 557, 536, 525, 525, 491, 412, 404, 310, 300, 281, 178, 148, 137, 121 |
| Gd | 785 3078, 2174, 2156, 1619, 1606, 1569, 1507, 1424, 1317, 1260, 1219, 1162, 1154, 1102, 1070, 1054, 1033, 886, 858, 788, 734, 639, 587, 557, 535, 526, 489, 411, 403, 366, 300, 283, 176, 149, 138                                                                      |
| Tb | 514 3132, 3097, 3080, 2174, 2163, 1621, 1605, 1571, 1507, 1476, 1426, 1315, 1259, 1249, 1220, 1154, 1117, 1054, 1034, 858, 790, 735, 638, 588, 557, 527, 491, 448, 411, 364, 316, 300, 283, 178, 148, 109                                                               |

*$\nu$ CN peaks are marked.*

**Table S14** Elemental analysis results for 50:50 SmTb blends

| Series                        |       | C (%) | H (%) | N (%) |
|-------------------------------|-------|-------|-------|-------|
| <b>1Ln</b>                    | Calc. | 25.62 | 2.29  | 9.96  |
|                               | Exp.  | 25.81 | 3.00  | 10.17 |
| <b>2Ln · 5 H<sub>2</sub>O</b> | Calc. | 22.83 | 1.92  | 10.24 |
|                               | Exp.  | 22.36 | 1.89  | 9.76  |

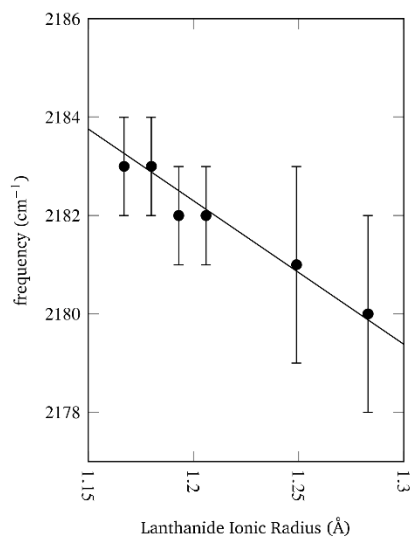

**Fig. S3** Frequency of the  $\nu$ CN stretching mode plotted versus lanthanide ionic radius for **1Ln** compounds.<sup>1</sup>

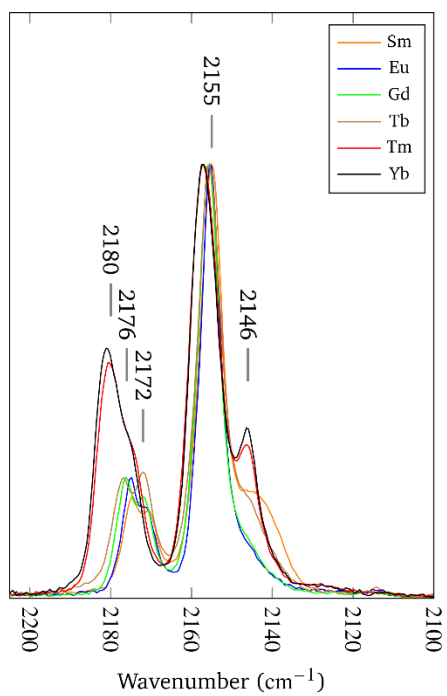

**Fig. S4**  $\nu$ CN region of the **1Ln** IR spectra.

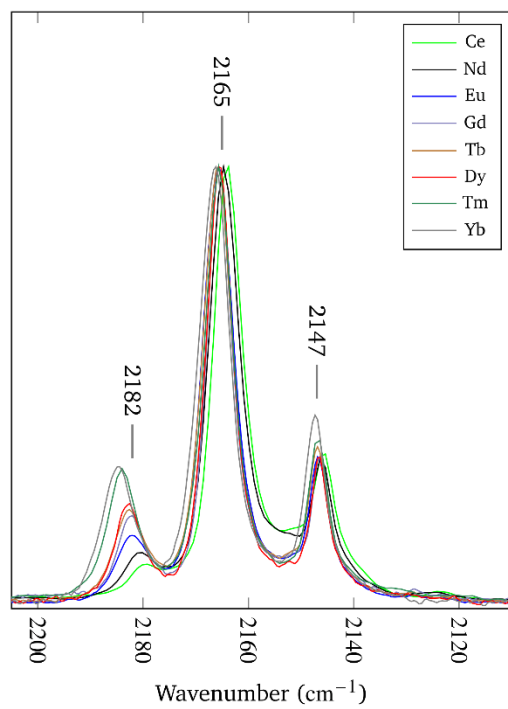

**Fig. S5**  $\nu_{\text{CN}}$  region of the  $2\text{Ln} \cdot 5 \text{H}_2\text{O}$  IR spectra.

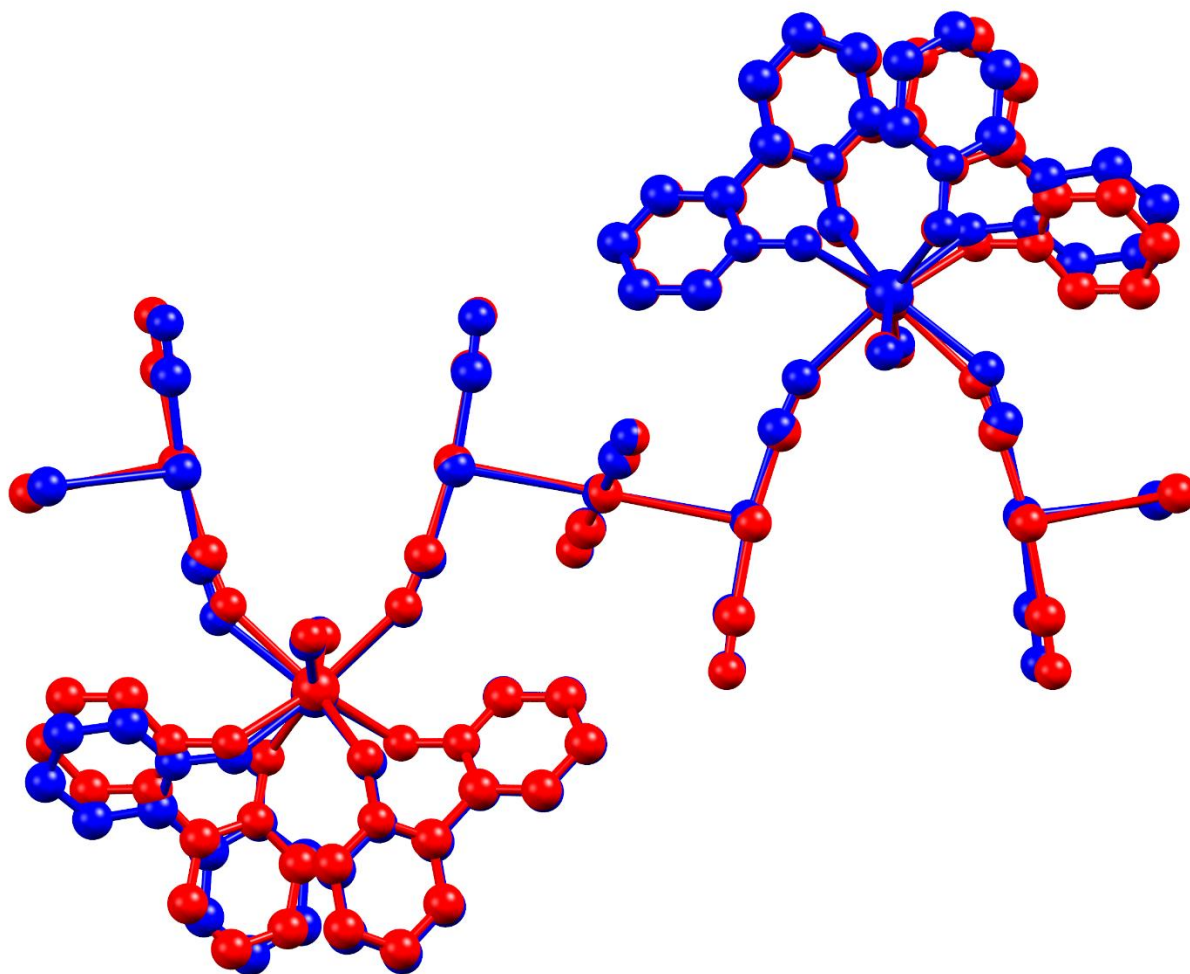

**Fig. S6** Overlay of the structures of  $2\text{Ln} \cdot 6 \text{H}_2\text{O}$  (Red) and  $2\text{Ln} \cdot 5 \text{H}_2\text{O}$  (Blue) showing that loss of the water molecule causes minimal long-range changes in the structure.

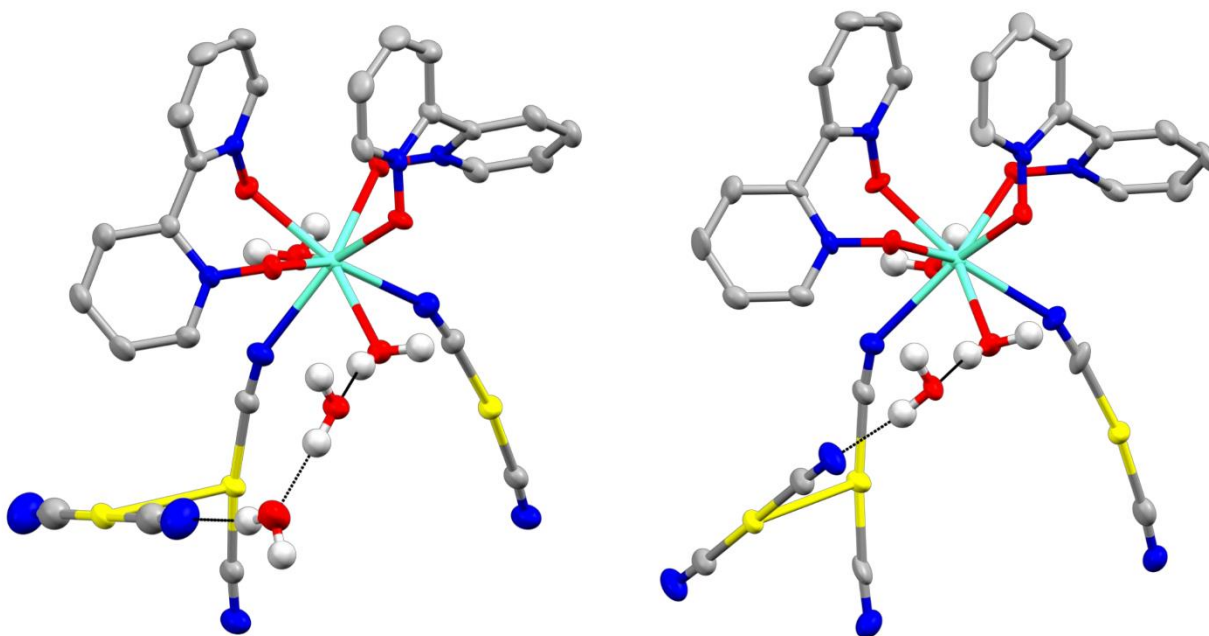

**Fig. S7** Comparison between the hydrogen bonding networks of  $2\text{Ln} \cdot 6 \text{H}_2\text{O}$  (Left) and  $2\text{Ln} \cdot 5 \text{H}_2\text{O}$  (Right). The terminal cyanide shifts to restore the hydrogen bond with the remaining water molecule after water loss occurs.

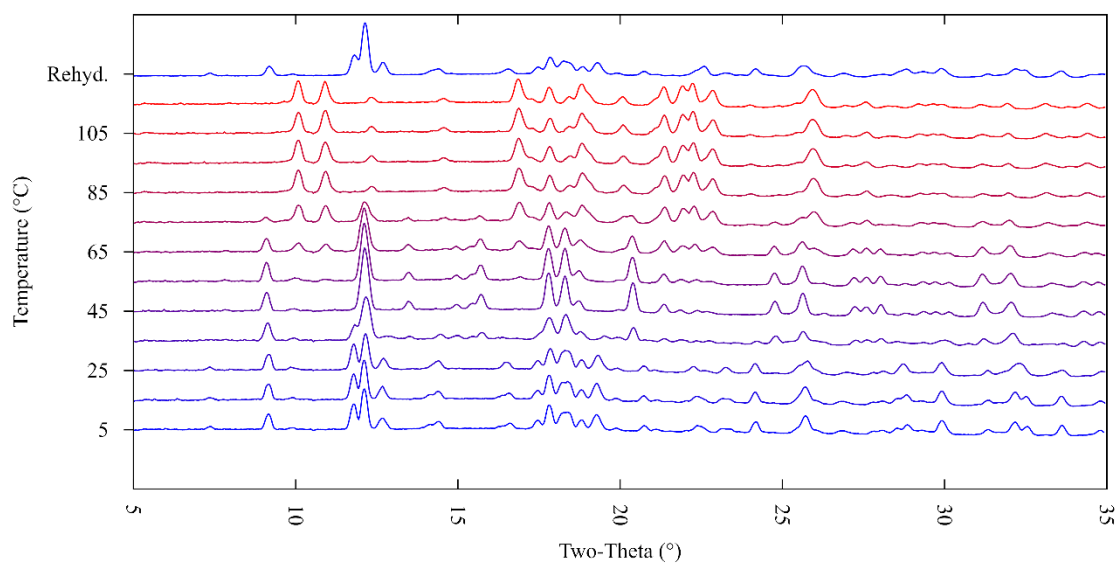

**Fig. S8** Variable temperature powder X-Ray diffractograms of  $2\text{Yb}$  showing successive dehydration events. The top diffractogram illustrates that the dehydration is reversible. Rehydration was accomplished by introducing the dehydrated sample to water vapor.

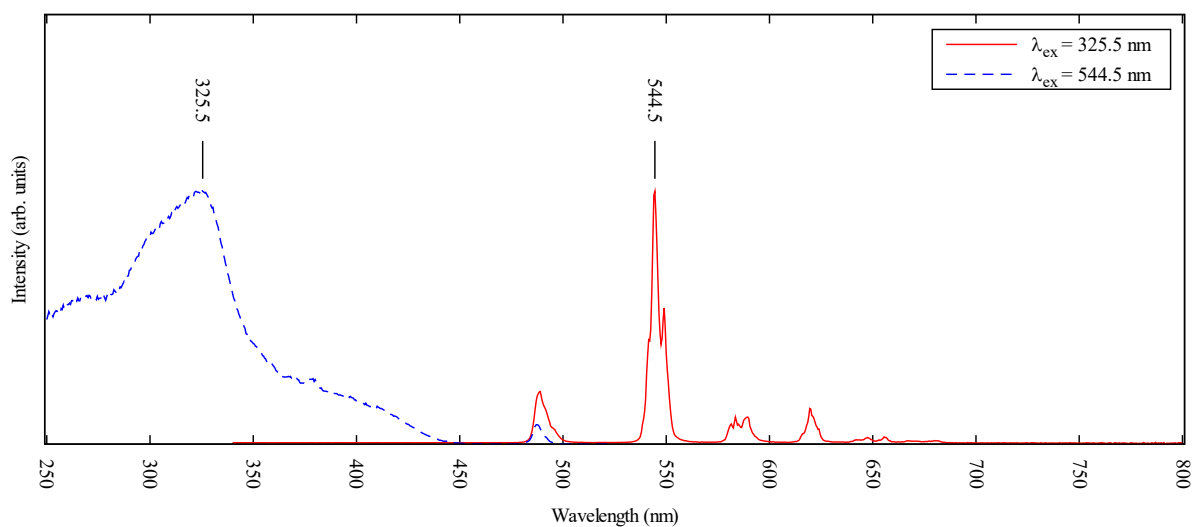

**Fig. S9** Solid state luminescence spectra of **1Tb**. The compound was emitting bright green light, as shown in Figure 10.

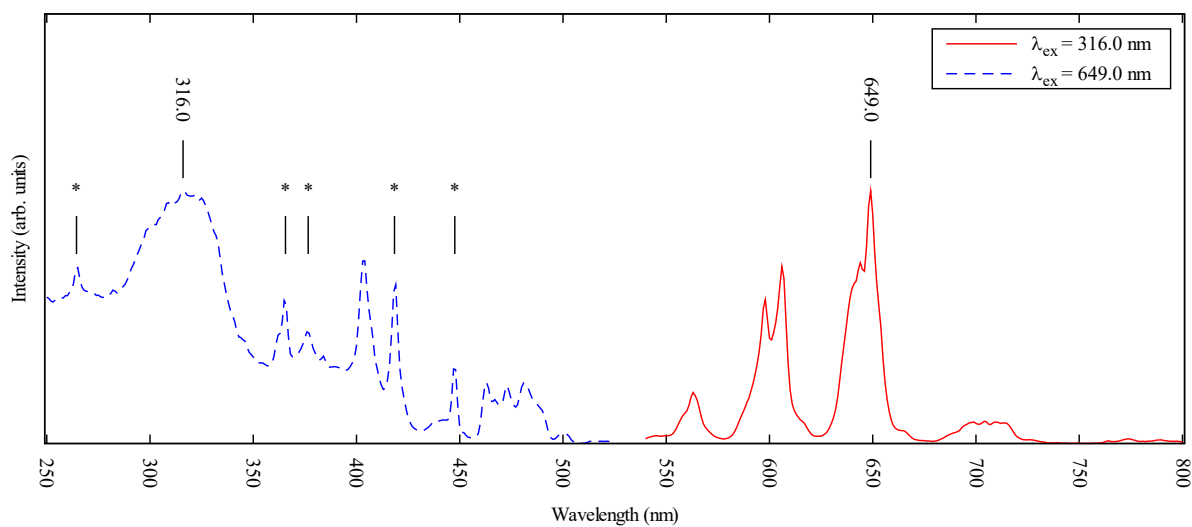

**Fig. S10** Solid state luminescence spectra of **1Sm** taken on a powdered sample that was emitting red light. \* denotes a peak due to an instrumental artifact.



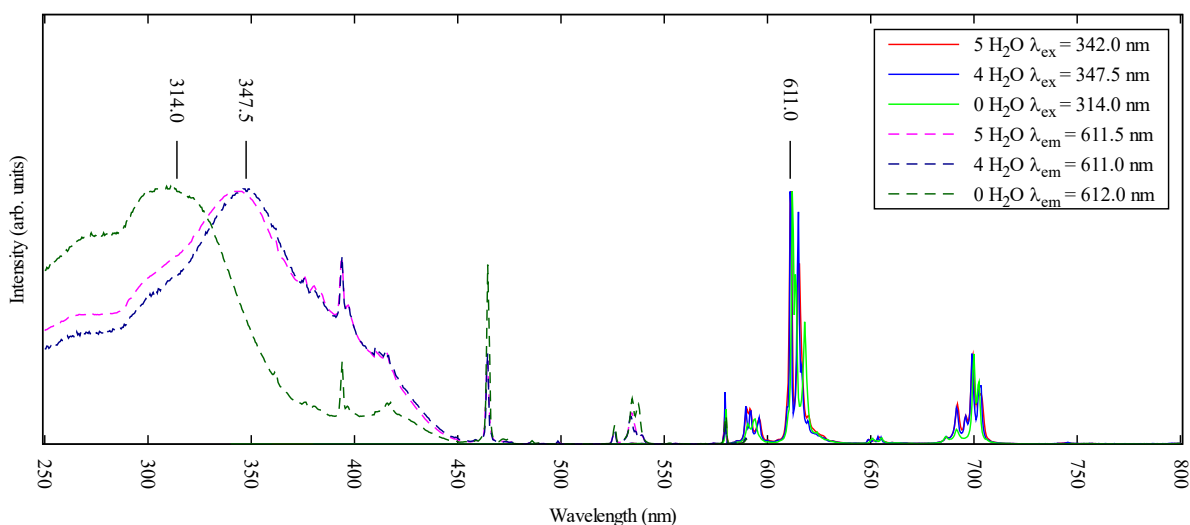

**Fig. S11** Solid state luminescence spectra of  $2\text{Eu} \cdot 5 \text{H}_2\text{O}$ ,  $2\text{Eu} \cdot 4 \text{H}_2\text{O}$ , and  $2\text{Eu} \cdot 0 \text{H}_2\text{O}$  demonstrating its bright red emission. All data in this series were acquired on the same sample after successive dehydrations. Not all emission and excitation wavelengths are marked on the figure since they are extremely close to one another.

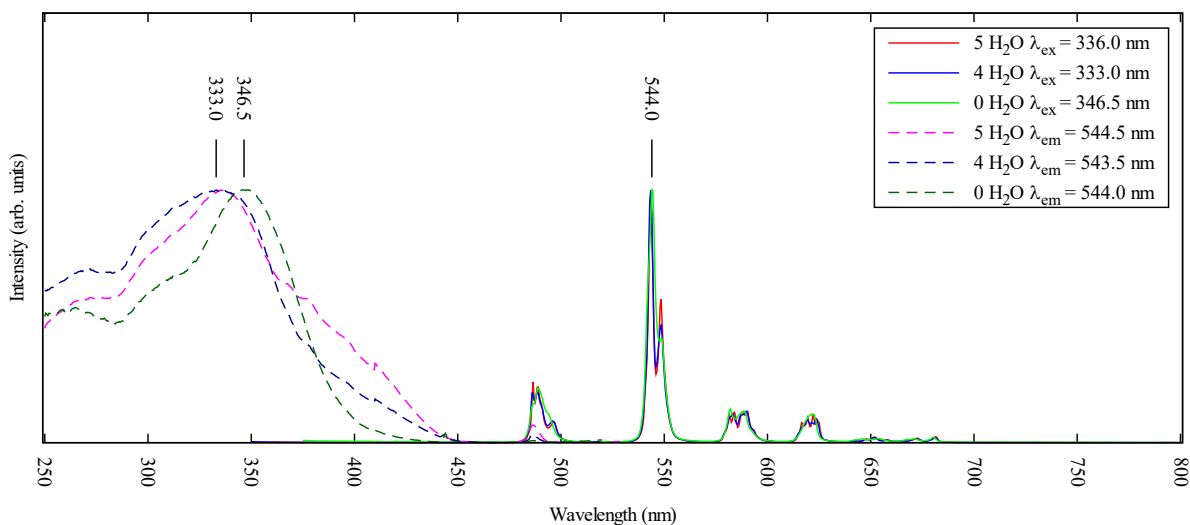

**Fig. S12** Solid state luminescence spectra of  $2\text{Tb} \cdot 5 \text{H}_2\text{O}$ ,  $2\text{Tb} \cdot 4 \text{H}_2\text{O}$ , and  $2\text{Tb} \cdot 0 \text{H}_2\text{O}$  demonstrating its bright green emission. Not all emission and excitation wavelengths are marked on the figure since they are extremely close to one another.

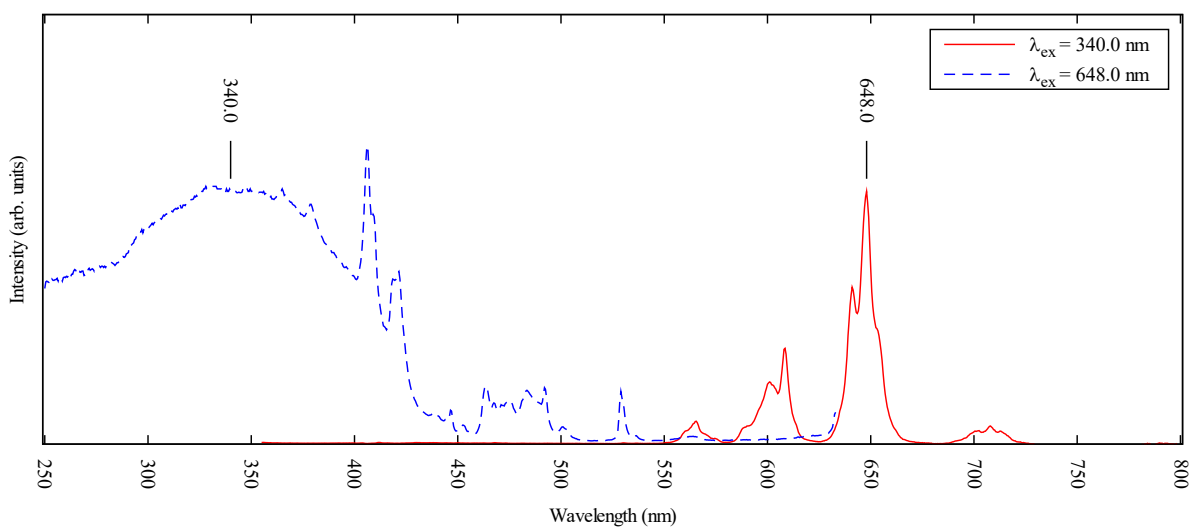

**Fig. S13** Solid state luminescence spectra of  $2\text{Sm} \cdot 5 \text{H}_2\text{O}$ , demonstrating its faint red emission.

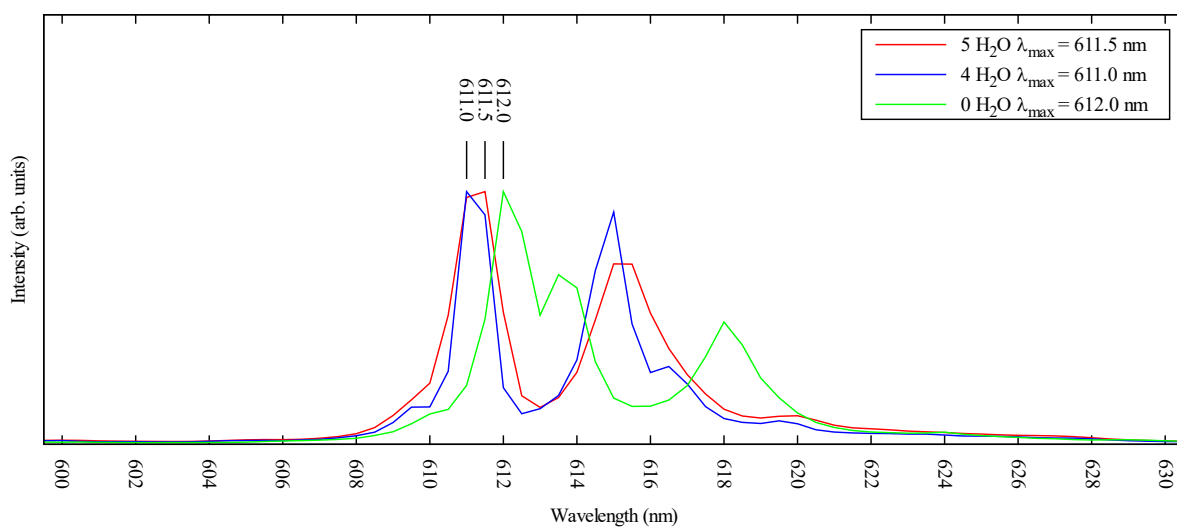

**Fig. S14** Solid state luminescence spectra of  $2\text{Eu} \cdot 5 \text{H}_2\text{O}$ ,  $2\text{Eu} \cdot 4 \text{H}_2\text{O}$ , and  $2\text{Eu} \cdot 0 \text{H}_2\text{O}$  showing the changes in the approx. 612 nm  $^5\text{D}_0 \rightarrow ^7\text{F}_2$  hypersensitive transition peak in response to desolvation. All data in this series were acquired on the same sample after successive dehydration events.

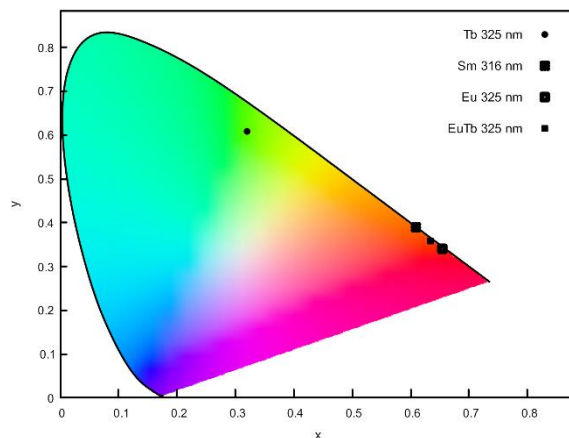

**Fig. S15** CIE 1931 diagram showing the colours of various species of **1Ln**.

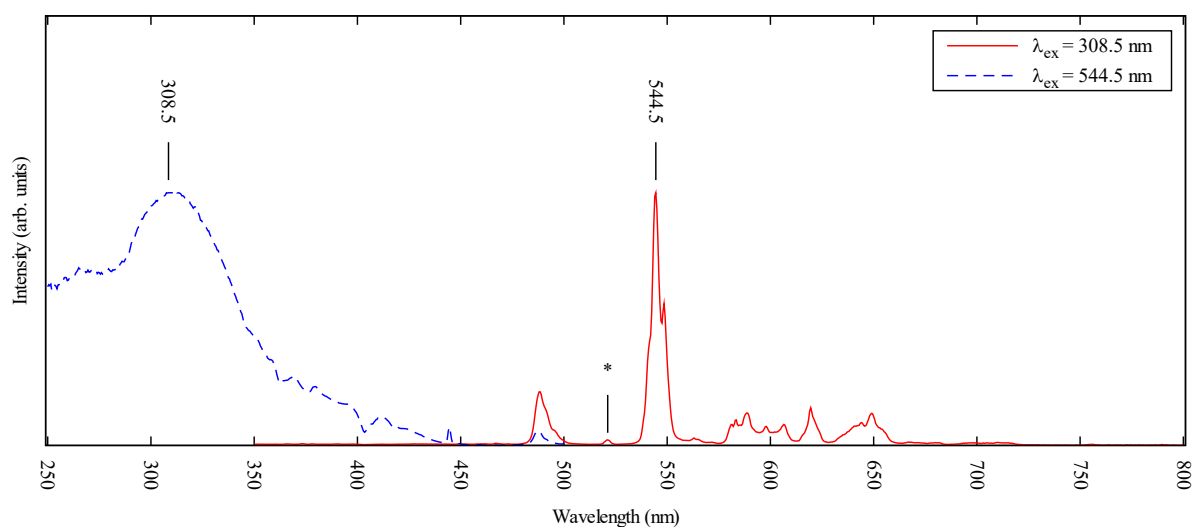

**Fig. S16** Solid state luminescence spectra of 50:50 **1SmTb** showing that excitation into the ligand manifold produces both Tb- and Sm-based emission. \* denotes a peak due to an instrument artifact.

## References

- (1) R. D. Shannon, *Acta Crystallogr. A* **1976**, *32*, 751–767.
